# Supplementary material for: CRISPR-based targeting of DNA methylation in Arabidopsis thaliana by a bacterial CG-specific DNA methyltransferase
Source: PubMed Central journal article supplement (PMC8201958; doi:10.1073/pnas.2125016118), 2021-05-31
Supplement: pnas.2125016118.sapp.pdf [file pnas.2125016118.sapp.pdf]

1 **Supplementary Information for**  
2  
3 **CRISPR-based targeting of DNA methylation in *Arabidopsis thaliana* by a bacterial**  
4 **CG-specific DNA methyltransferase.**

5  
6  
7 Basudev Ghoshal<sup>a,#</sup>, Colette L. Picard<sup>a,#</sup>, Brandon Vong<sup>a</sup>, Suhua Feng<sup>a,b</sup>, Steven E.  
8 Jacobsen<sup>a,b,c,1</sup>

9  
10 #contributed equally

11 <sup>1</sup>To whom correspondence should be addressed. E-mail: [jacobsen@ucla.edu](mailto:jacobsen@ucla.edu)

12  
13 <sup>a</sup>Department of Molecular, Cell and Developmental Biology, University of California, Los  
14 Angeles, CA 90095

15 <sup>b</sup>Eli and Edythe Broad Center of Regenerative Medicine and Stem Cell Research,  
16 University of California, Los Angeles, CA 90095

17 <sup>c</sup>Howard Hughes Medical Institute, University of California, Los Angeles, CA 90095

18  
19 **This PDF file includes:**  
20  
21 **Figures S1 to S9**

22  
23  
24  
25  
26  
27  
28

29

30 **Supplementary figures:**

31 **Figure S1.**

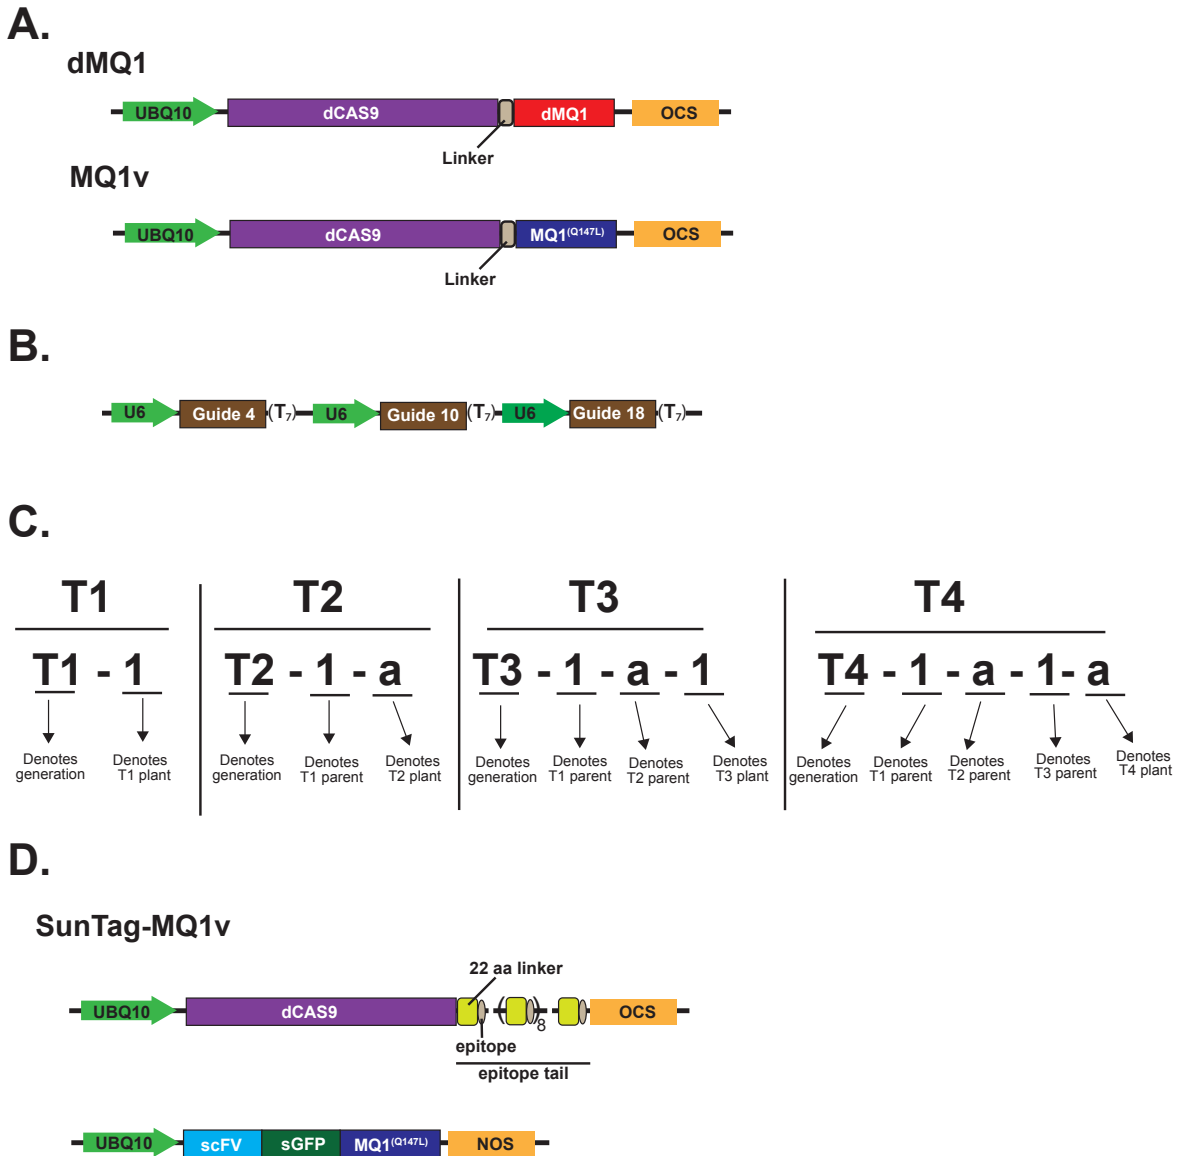

32

33 **Figure S1. CRISPR-based methylation systems used with MQ1<sup>(Q147L)</sup> in this study**  
 34 **to target DNA methylation** **A)** Schematic representation of the direct fusion of  
 35 catalytically inactive Cas9 (dCAS9) fused to MQ1<sup>(Q147L)</sup> (MQ1v) and a catalytically inactive  
 36 mutant of MQ1 (dMQ1). Both fusions were expressed from a constitutive UBQ10  
 37 promoter with the OCS terminator. **B)** Schematic of guide RNA construct used to target  
 38 constructs to *FWA*, consisting of three single guide RNAs (guide 4, guide 10, guide 18),

39 each with a PolII (U6) promoter and a stretch of poly (T)'s as a terminator. Guide 4 binds  
40 upstream of the transcription start site (TSS), guide 10 binds to the TSS, and guide 18  
41 binds to the 5'UTR downstream of TSS (8). **C)** Naming schema for plants in T1, T2, T3,  
42 and T4 generations. **D)** Schematic representation of the SunTag system with MQ1<sup>(Q147L)</sup>  
43 (SunTag-MQ1v). In the SunTag system, the dCAS9 is fused to an epitope tail that  
44 contains ten peptide repeats. Each epitope is linked by a twenty-two amino acid linker  
45 (22aa). The MQ1<sup>(Q147L)</sup> effector is expressed as a fusion with the single-chain variable  
46 fragment (scFV) that can bind to the epitope.

47

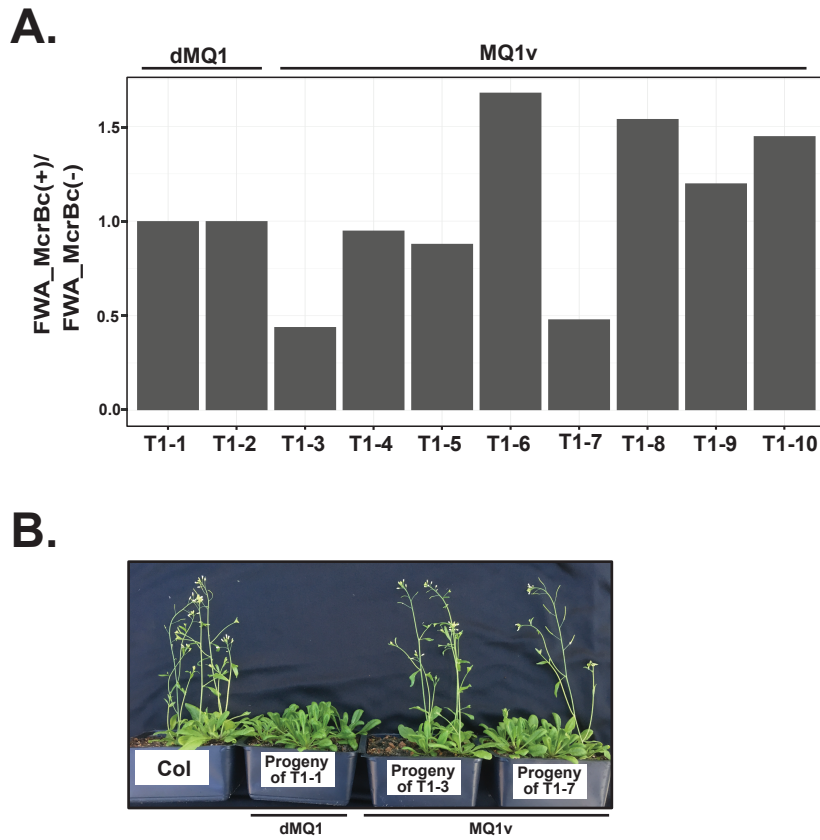

49

50 **Figure S2. Targeted DNA methylation by MQ1v causes DNA methylation changes**  
 51 **in T1 plants and early flowering in T2 plants. A)** DNA methylation levels at *FWA*  
 52 assayed by McrBC-qPCR for eight MQ1v plants in the T1 generation and two dMQ1  
 53 control plants. Each T1 plant is the result of an independent transgenic event. **B)**  
 54 Examples of early-flowering T2 progeny of two T1 (T1-3, T1-7) plants, with Col wild type  
 55 and T2 progeny of T1-1 (a dMQ1 control) as controls for early- and late-flowering  
 56 phenotypes, respectively.

57



**A.**

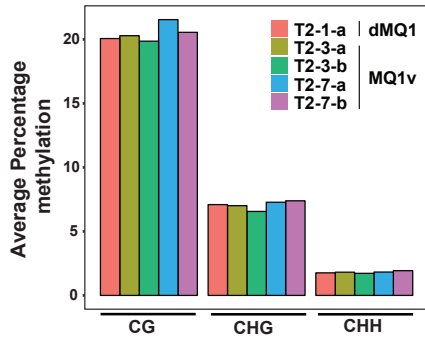

**B.**

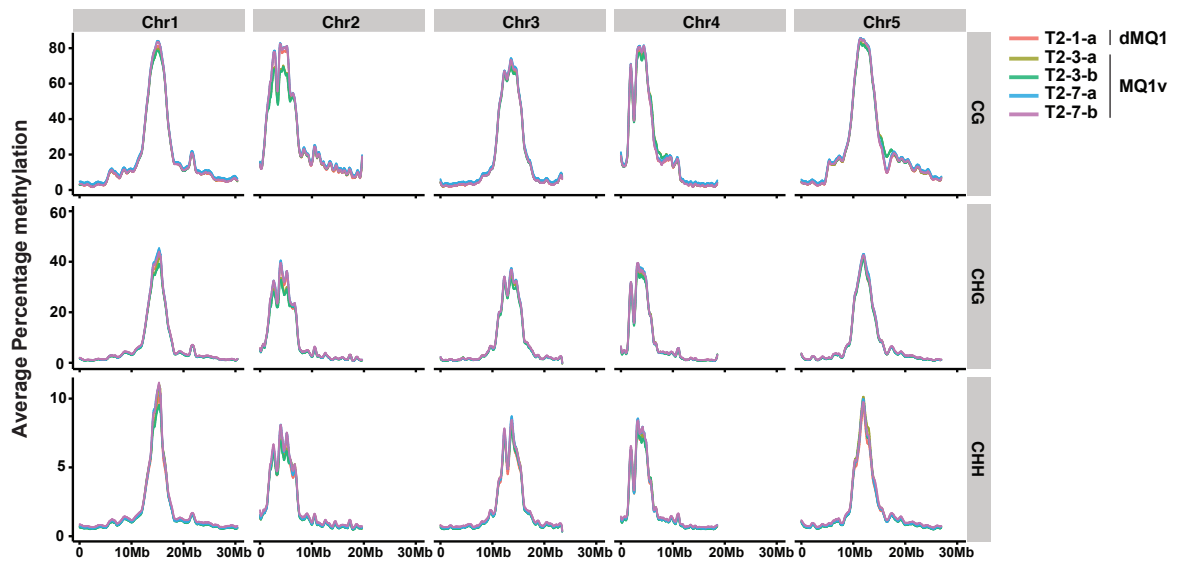

59

60 **Figure S3. Genome-wide DNA methylation patterns in MQ1v transformed T2 plants**  
 61 **relative to a dMQ1 control.** Comparison of whole genome methylation patterns in four  
 62 T2 early-flowering transgenic plants (T2-3-a, T2-3-b, T2-7-a, T2-7-b) compared to a  
 63 dMQ1 matched control (T2-1-a). **A)** Bar graphs showing whole genome methylation  
 64 percentages. **B)** Average methylation levels over each chromosome, obtained via locally  
 65 weighted regression of average methylation levels over 50 kb bins (see methods).

66

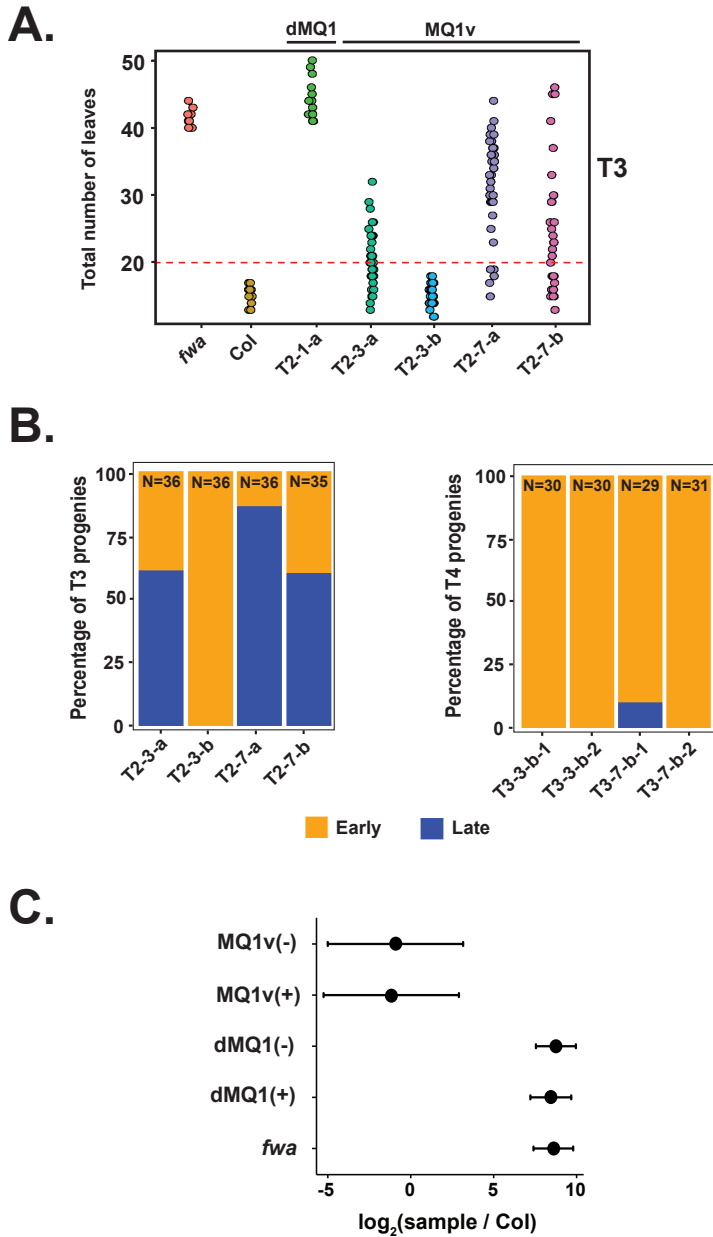

68

69 **Figure S4. Heritability of targeted DNA methylation in T3 plants and *FWA***  
 70 **expression in T4 plants. A)** Dot plot of leaf count at flowering time for T3 MQ1v and  
 71 dMQ1 plants. T2 parents are labeled on the bottom of the figure. *fwa* and *Col* plants are  
 72 included as controls. **B)** Stacked bar plot showing the percentage of T3 (left panel) and  
 73 T4 (right panel) early and late flowering plants in the progeny of four different T2 and T3  
 74 early flowering lines, respectively. Percentage of early flowering plants is denoted in the  
 75 bar plots. The number of progeny plants assayed (N) for each line were 36, 36, 36, 35,  
 76 30, 30, 29, and 31. **C)** *FWA* expression in *fwa*, early-flowering T4 MQ1v plants both with  
 77 (+) and without (-) the MQ1v transgene, and matched dMQ1 (also +/- transgene). The x-

78 axis indicates  $\log_2(\text{genotype} / \text{Col})$  for each genotype indicated along the y-axis, and error  
79 bars correspond to  $\pm 1$  standard error across 3 replicates per genotype, both calculated  
80 using DESeq2 (27).

81

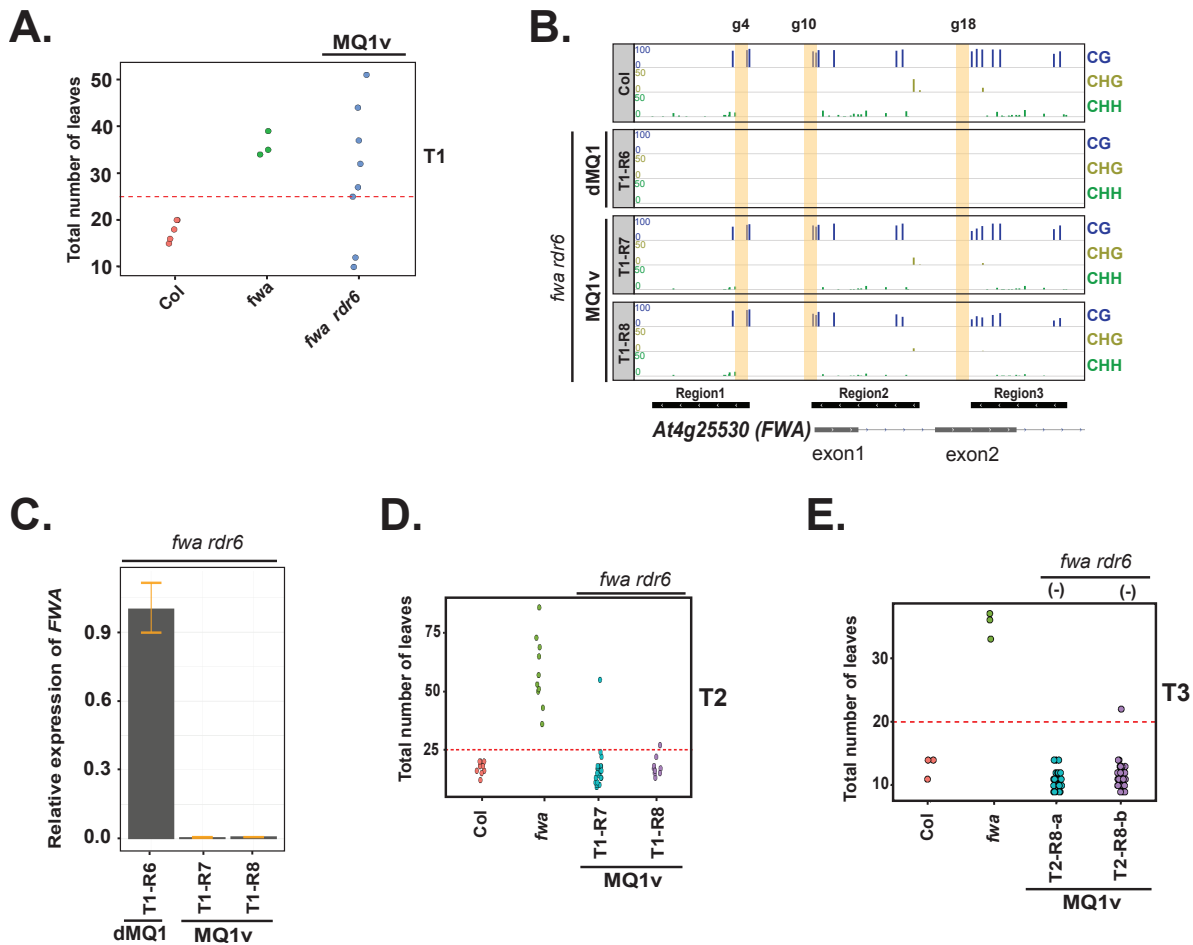

83

84 **Figure S5. MQ1v targeted DNA methylation in an *rdr6* mutant background.** **A)** Dot  
 85 plot of leaf count at flowering time for T1 plants transformed with dCAS9-MQ1v in the *fwa*  
 86 *rdr6* background. *fwa* and Col plants are included as controls. Each T1 plant is the result  
 87 of an independent transgenic event. **B)** Bisulfite PCR sequencing of two early-flowering  
 88 T1 MQ1v lines in the *fwa rdr6* background (T1-R7 and T1-R8) over three regions of the  
 89 *FWA* promoter region: region 1 (Chr4:13038143 to 13038272), region 2 (Chr4:13038356  
 90 to 13038499) and region 3 (Chr4:13038568 to 13038695). A dMQ1 T1 plant was used as  
 91 a negative control (T1-R6). Vertical yellow bars indicate the locations of the guide 4, guide  
 92 10, and guide 18 binding sites **C)** *FWA* qPCR expression analysis in two early-flowering  
 93 T1 MQ1v plants in *fwa rdr6*, relative to a dMQ1 negative control. Error bars indicate  
 94 standard deviations (n=3 technical replicates). **D-E)** Dot plot of leaf count at flowering time  
 95 for T2 MQ1v plants (d) and T3 MQ1v plants (e) in *fwa rdr6* mutant backgrounds. The  
 96 name of the T1 (D) and T2 (E) parent is listed at the bottom of the figure. The two T2  
 97 parent plants in (E) lacked the MQ1v construct by PCR based genotyping. *fwa* and Col  
 98 plants are included as controls.

99 **Figure S6.**

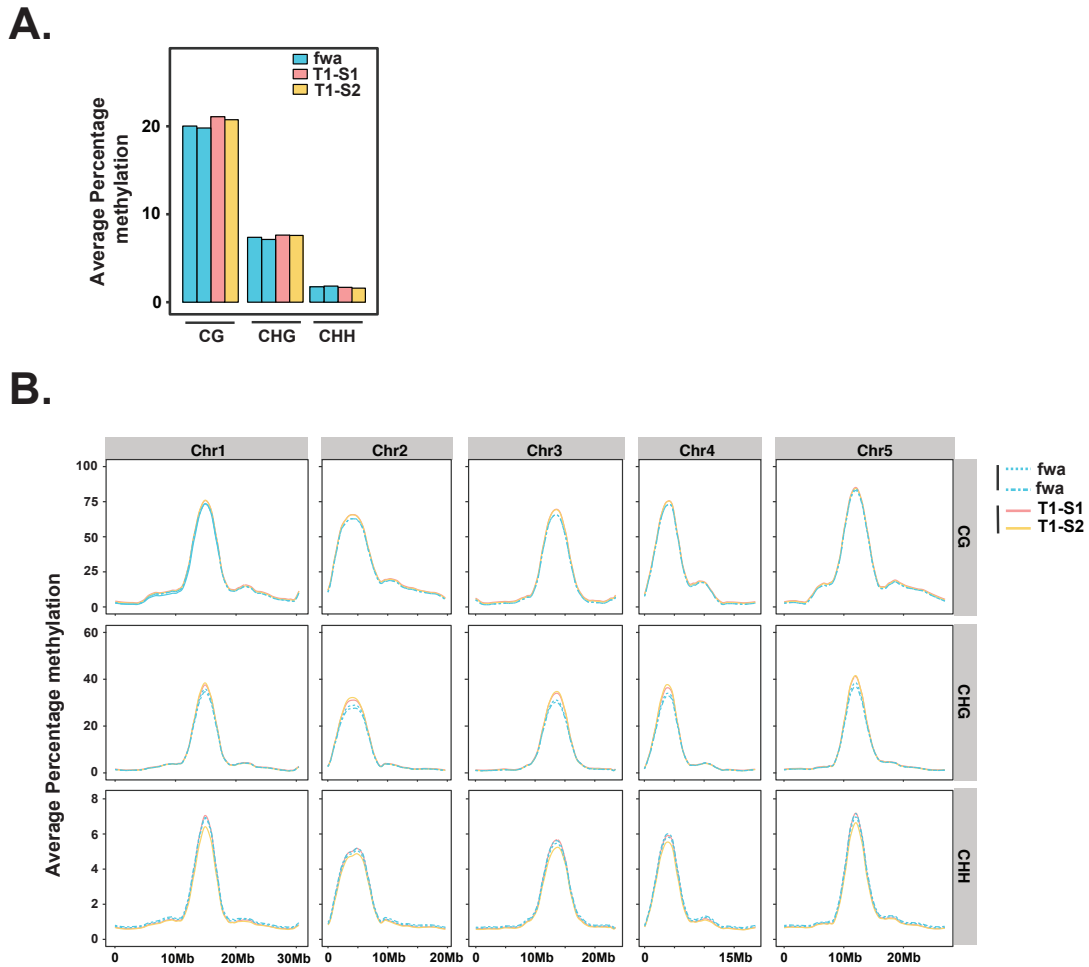

100

101 **Figure S6. Genome-wide DNA methylation patterns in SunTag-MQ1v transformed**  
 102 **T1 plants relative to a *fwa* control.** Comparison of whole-genome methylation  
 103 patterns in two T1 early-flowering transgenic plants (T1-S1, T1-S2) compared to  
 104 a *fwa* control. **A)** Bar graphs showing whole-genome methylation  
 105 percentages. **B)** Average methylation levels over each chromosome, obtained via  
 106 locally weighted regression of average methylation levels over 50 kb bins (see  
 107 methods).

108

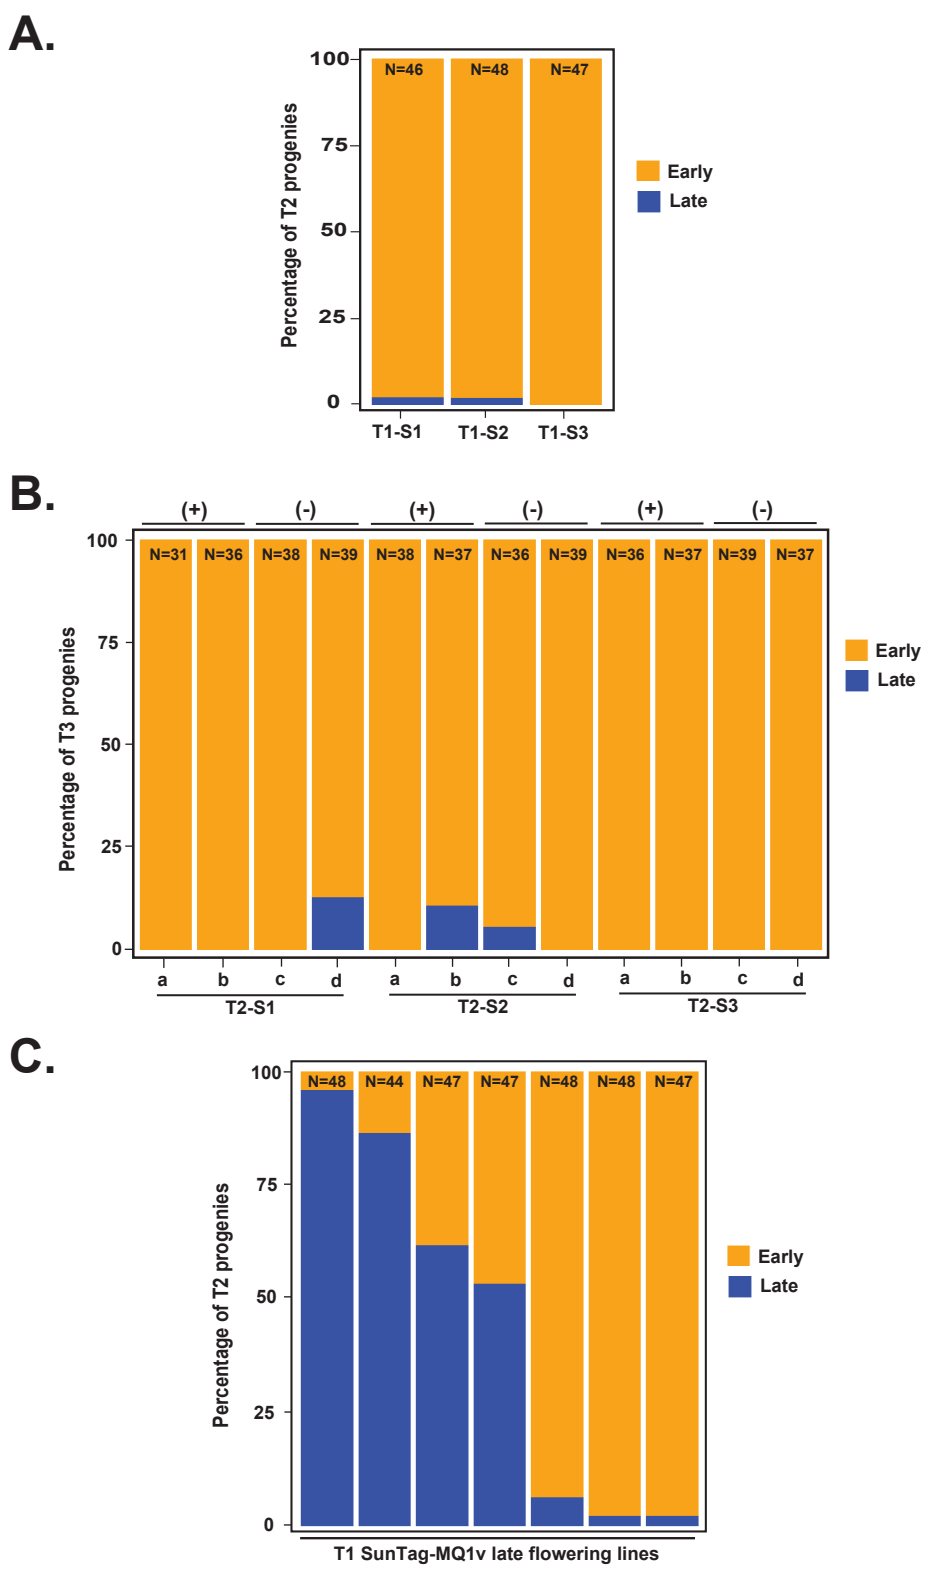

111 **Figure S7. Percentage of early flowering T2 and T3 SunTag-MQ1v plants. A-B)**  
112 Stacked bar plot showing the percentage of early and late flowering plants among the T2  
113 (A) and T3 (B) progeny of three T1 and twelve T2 early flowering lines. Transgene positive  
114 and negative T2 parents are denoted by symbols plus (+) and minus(-), respectively. The  
115 number (N) of T2 plants assayed for each line were 46, 48, 47. The number (N) of T3  
116 plants assayed for each line were 31, 36, 38, 39, 38, 37, 36, 39, 36, 37, 39, and 37. **C)**  
117 Stacked bar plot showing the percentage of early and late flowering plants among the T2  
118 progeny of seven late flowering T1 SunTag-MQ1v plants. The number (N) of progeny  
119 plants assayed for each line were 48, 44, 47, 47, 48, 48, and 47. Percentage of early  
120 flowering plants is denoted in the bar plots.  
121

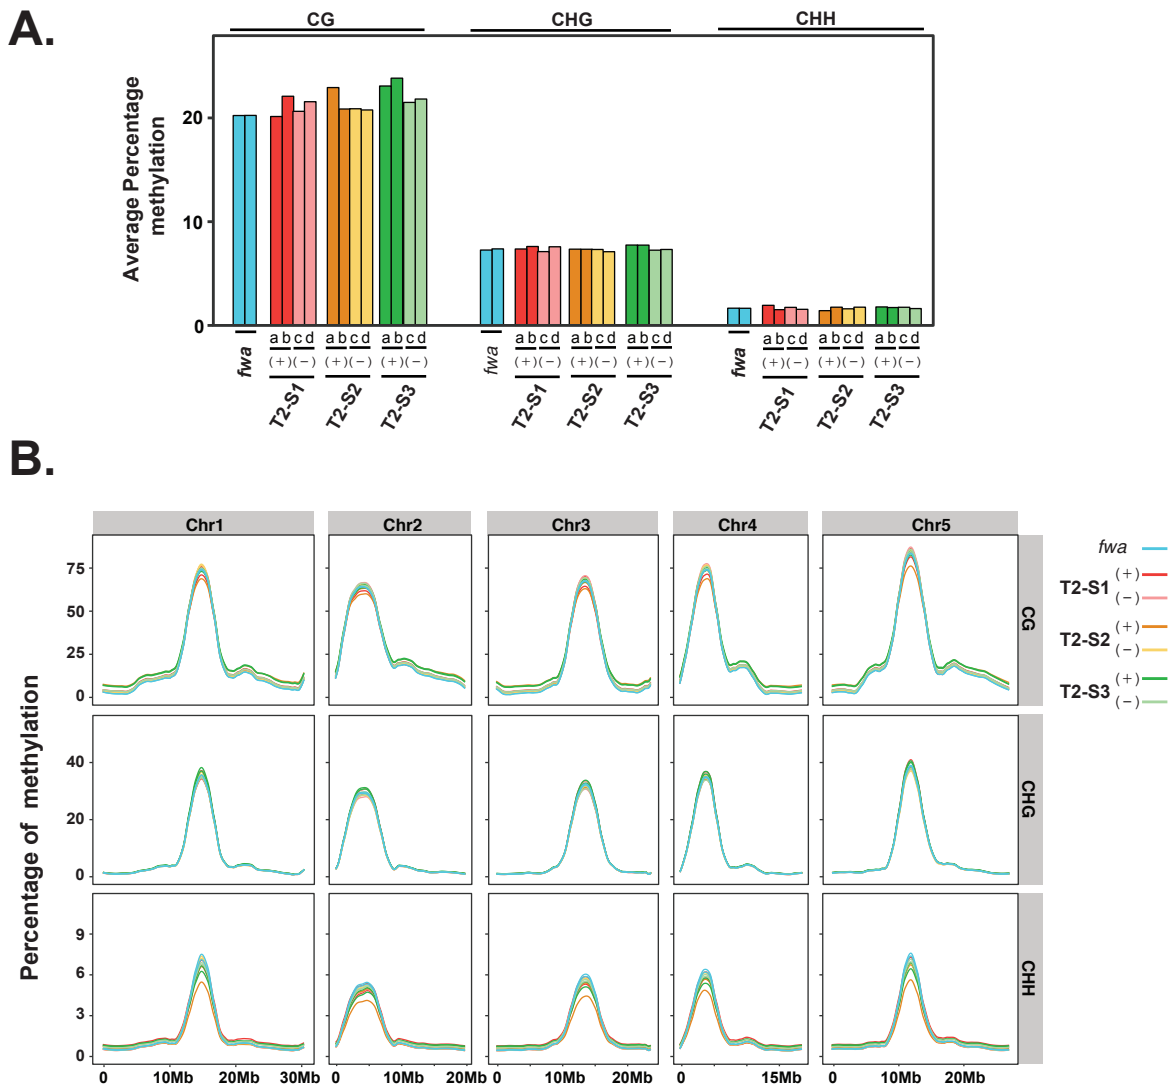

123  
 124 **Figure S8. Genome-wide DNA methylation patterns in T2 progeny of SunTag-MQ1v**  
 125 **transformed T1 plants.** Comparison of whole-genome methylation patterns in six T2  
 126 early-flowering transgene positive (T2-S1-a, T2-S1-b, T2-S2-a, T2-S2-b, T2-S3-a, and  
 127 T2-S3-b) and six transgene negative (T2-S1-c, T2-S1-d, T2-S2-c, T2-S2-d, T2-S3-c, and  
 128 T2-S3-d) plants compared to a *fwa* matched control. **A)** Bar graphs showing whole-  
 129 genome methylation percentages. **B)** Average methylation levels over each  
 130 chromosome, obtained via locally weighted regression of average methylation levels over  
 131 50 kb bins (see methods).  
 132



133 **Figure S9.**

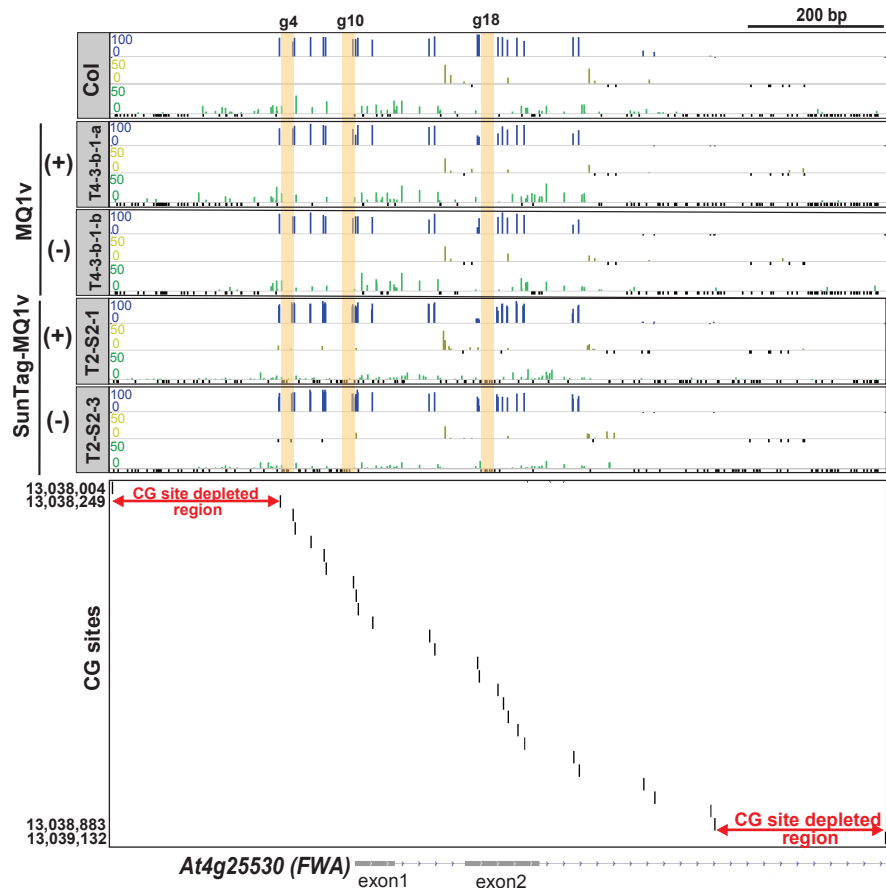

134  
 135  
 136  
 137  
 138  
 139  
 140  
 141  
 142

**Figure S9. Comparing DNA methylation patterns introduced by MQ1v and SunTag-MQ1v.** (top) DNA methylation profile at the *FWA* promoter region in two T4 MQ1v and two T2 SunTag-MQ1v early-flowering plants, relative to Col wild type control. Transgene positive and negative plants are denoted by symbols plus (+) and minus(-), respectively. (bottom) Locations of all CG sites in the region Chr4:13038004-13039132; each CG site is shown as a vertical bar. Flanking CG-depleted regions are highlighted. Vertical yellow bars indicate the locations of the guide 4, guide 10, and guide 18 binding sites.
